# Supplementary material
Source: HighWire-hosted journal article supplement (https://gh.bmj.com/content/3/6/e000964)
Supplement: inline-supplementary-material-1 [file inline-supplementary-material-1.docx]

**Supplementary File 1. Cost per DALY averted for each method and percent of GDP per capita (2015 US$)**

| Country | DALY 1 | | DALY 2 | | DALY 3 | | DALY 4 | |
| --- | --- | --- | --- | --- | --- | --- | --- | --- |
| Albania | $3,259 | 83% | $2,087 | 53% | $3,338 | 85% | $2,761 | 70% |
| Algeria | $4,646 | 110% | $4,086 | 97% | $6,485 | 154% | $5,475 | 130% |
| Argentina | $6,794 | 51% | $4,936 | 37% | $7,469 | 56% | $6,582 | 49% |
| Armenia | $1,312 | 38% | $954 | 27% | $1,422 | 41% | $1,268 | 36% |
| Azerbaijan | $1,599 | 29% | $1,345 | 24% | $1,954 | 36% | $1,794 | 33% |
| Bangladesh | $132 | 11% | $114 | 9% | $165 | 14% | $151 | 12% |
| Belarus | $4,967 | 87% | $3,113 | 54% | $4,225 | 74% | $4,074 | 71% |
| Belize | $4,808 | 99% | $2,935 | 60% | $4,378 | 90% | $3,879 | 80% |
| Benin | $200 | 26% | $171 | 22% | $202 | 26% | $223 | 29% |
| Bolivia | $2,505 | 81% | $2,106 | 68% | $3,053 | 99% | $2,799 | 91% |
| Botswana | $3,411 | 54% | $2,097 | 33% | $2,629 | 41% | $2,702 | 42% |
| Brazil | $8,397 | 98% | $6,048 | 71% | $9,318 | 109% | $8,047 | 94% |
| Bulgaria | $5,952 | 85% | $4,067 | 58% | $5,787 | 83% | $5,339 | 76% |
| Burkina Faso | $138 | 23% | $139 | 24% | $155 | 26% | $182 | 31% |
| Burundi | $107 | 38% | $99 | 36% | $113 | 41% | $131 | 47% |
| Cambodia | $276 | 24% | $189 | 16% | $262 | 23% | $248 | 21% |
| Cameroon | $112 | 9% | $107 | 9% | $123 | 10% | $140 | 12% |
| Cape Verde | $2,490 | 81% | $1,938 | 63% | $2,843 | 92% | $2,579 | 84% |
| Chad | $124 | 16% | $127 | 16% | $139 | 18% | $165 | 21% |
| China | $5,076 | 63% | $3,650 | 45% | $5,669 | 71% | $4,896 | 61% |
| Colombia | $9,555 | 158% | $7,067 | 117% | $11,459 | 189% | $9,484 | 157% |
| Comoros | $240 | 33% | $233 | 33% | $307 | 43% | $311 | 43% |
| Congo | $1,366 | 74% | $1,235 | 67% | $1,537 | 83% | $1,613 | 87% |
| Costa Rica | $18,262 | 162% | $12,473 | 111% | $21,327 | 189% | $16,739 | 149% |
| Cote d'Ivoire | $214 | 15% | $205 | 15% | $236 | 17% | $268 | 19% |
| Democratic Republic of the Congo | $54 | 12% | $54 | 12% | $64 | 14% | $69 | 15% |
| Dominican Republic | $4,045 | 63% | $2,731 | 42% | $4,005 | 62% | $3,594 | 56% |
| Ecuador | $5,796 | 93% | $4,479 | 72% | $6,965 | 112% | $5,991 | 97% |
| Egypt | $1,194 | 33% | $977 | 27% | $1,474 | 41% | $1,301 | 36% |
| El Salvador | $3,832 | 91% | $2,573 | 61% | $3,753 | 89% | $3,424 | 81% |
| Eritrea | $120 | 22% | $112 | 21% | $137 | 25% | $147 | 27% |
| Ethiopia | $176 | 28% | $167 | 27% | $206 | 33% | $221 | 36% |
| Gabon | $2,756 | 33% | $2,275 | 28% | $3,047 | 37% | $2,955 | 36% |
| Georgia | $1,044 | 27% | $743 | 20% | $1,032 | 27% | $981 | 26% |
| Ghana | $411 | 30% | $371 | 27% | $460 | 34% | $491 | 36% |
| Guatemala | $1,473 | 38% | $1,226 | 31% | $1,726 | 44% | $1,638 | 42% |
| Guinea | $115 | 22% | $111 | 21% | $126 | 24% | $145 | 27% |
| Guinea-Bissau | $55 | 10% | $52 | 9% | $58 | 10% | $68 | 12% |
| Guyana | $2,130 | 52% | $1,566 | 38% | $2,147 | 52% | $2,067 | 50% |
| Haiti | $190 | 23% | $133 | 16% | $170 | 21% | $172 | 21% |
| Honduras | $2,242 | 89% | $1,707 | 68% | $2,530 | 100% | $2,282 | 90% |
| India | $291 | 18% | $264 | 17% | $363 | 23% | $349 | 22% |
| Indonesia | $691 | 21% | $535 | 16% | $778 | 23% | $714 | 21% |
| Jamaica | $2,466 | 47% | $2,137 | 41% | $3,270 | 63% | $2,868 | 55% |
| Jordan | $6,162 | 125% | $4,917 | 100% | $8,771 | 178% | $6,618 | 134% |
| Kazakhstan | $5,809 | 55% | $3,734 | 36% | $5,213 | 50% | $4,917 | 47% |
| Kenya | $542 | 39% | $491 | 36% | $623 | 45% | $647 | 47% |
| Kyrgyzstan | $973 | 88% | $644 | 58% | $883 | 80% | $847 | 77% |
| Lebanon | $6,018 | 75% | $4,704 | 58% | $9,105 | 113% | $6,363 | 79% |
| Lesotho | $704 | 66% | $556 | 52% | $629 | 59% | $718 | 67% |
| Macedonia | $6,335 | 131% | $3,373 | 70% | $5,261 | 108% | $4,429 | 91% |
| Madagascar | $70 | 17% | $66 | 16% | $82 | 20% | $87 | 22% |
| Malawi | $130 | 35% | $124 | 33% | $142 | 38% | $164 | 44% |
| Malaysia | $6,875 | 70% | $4,396 | 45% | $7,314 | 75% | $5,898 | 60% |
| Mali | $69 | 10% | $71 | 10% | $77 | 11% | $93 | 13% |
| Mauritania | $279 | 20% | $272 | 20% | $356 | 26% | $360 | 26% |
| Mauritius | $4,653 | 50% | $3,560 | 38% | $5,442 | 59% | $4,776 | 52% |
| Mexico | $7,449 | 83% | $5,723 | 64% | $8,730 | 97% | $7,700 | 86% |
| Moldova | $2,314 | 125% | $1,570 | 85% | $2,353 | 127% | $2,084 | 113% |
| Mongolia | $1,949 | 49% | $1,394 | 35% | $1,865 | 47% | $1,848 | 47% |
| Morocco | $1,119 | 39% | $927 | 32% | $1,484 | 52% | $1,235 | 43% |
| Mozambique | $231 | 44% | $189 | 36% | $217 | 41% | $244 | 46% |
| Namibia | $5,014 | 107% | $3,142 | 67% | $3,948 | 84% | $4,061 | 87% |
| Nepal | $256 | 34% | $206 | 28% | $291 | 39% | $272 | 37% |
| Nicaragua | $3,674 | 176% | $1,830 | 88% | $2,840 | 136% | $2,403 | 115% |
| Niger | $88 | 25% | $90 | 25% | $98 | 27% | $118 | 33% |
| Nigeria | $214 | 8% | $223 | 8% | $254 | 10% | $291 | 11% |
| Pakistan | $138 | 10% | $133 | 9% | $169 | 12% | $175 | 12% |
| Panama | $14,446 | 109% | $11,003 | 83% | $17,101 | 129% | $14,711 | 111% |
| Paraguay | $5,797 | 142% | $3,401 | 83% | $5,199 | 127% | $4,467 | 109% |
| Peru | $4,756 | 79% | $3,836 | 64% | $6,531 | 108% | $5,163 | 86% |
| Philippines | $822 | 28% | $672 | 23% | $987 | 34% | $898 | 31% |
| Romania | $7,838 | 87% | $5,382 | 60% | $7,782 | 87% | $7,104 | 79% |
| Russia | $7,424 | 82% | $4,640 | 51% | $6,350 | 70% | $6,031 | 66% |
| Rwanda | $240 | 34% | $211 | 30% | $258 | 37% | $277 | 40% |
| Senegal | $352 | 39% | $284 | 32% | $351 | 39% | $371 | 41% |
| Sierra Leone | $108 | 17% | $105 | 16% | $116 | 18% | $137 | 21% |
| South Africa | $3,334 | 58% | $2,480 | 43% | $3,103 | 54% | $3,224 | 56% |
| Sri Lanka | $1,642 | 42% | $1,281 | 33% | $2,090 | 53% | $1,734 | 44% |
| Sudan | $315 | 13% | $302 | 12% | $389 | 16% | $398 | 16% |
| Swaziland | $2,351 | 73% | $1,505 | 47% | $1,773 | 55% | $1,923 | 60% |
| Tajikistan | $362 | 39% | $323 | 35% | $449 | 48% | $432 | 47% |
| Tanzania | $248 | 28% | $231 | 26% | $278 | 32% | $305 | 35% |
| Thailand | $6,507 | 112% | $4,069 | 70% | $6,006 | 103% | $5,388 | 93% |
| The Gambia | $266 | 56% | $247 | 52% | $312 | 66% | $326 | 69% |
| Togo | $130 | 23% | $117 | 21% | $136 | 24% | $153 | 27% |
| Tunisia | $3,553 | 92% | $2,763 | 71% | $4,730 | 122% | $3,706 | 96% |
| Turkey | $9,104 | 100% | $7,446 | 82% | $13,032 | 143% | $10,028 | 110% |
| Turkmenistan | $1,971 | 30% | $1,636 | 25% | $2,230 | 33% | $2,181 | 33% |
| Uganda | $129 | 18% | $117 | 17% | $136 | 19% | $154 | 22% |
| Ukraine | $1,626 | 77% | $1,059 | 50% | $1,439 | 68% | $1,383 | 65% |
| Uzbekistan | $1,218 | 57% | $985 | 46% | $1,426 | 67% | $1,318 | 62% |
| Venezuela | $4,886 | 40% | $3,618 | 29% | $5,540 | 45% | $4,821 | 39% |
| Vietnam | $1,725 | 82% | $1,198 | 57% | $1,813 | 86% | $1,602 | 76% |
| Yemen | $219 | 16% | $202 | 14% | $260 | 19% | $267 | 19% |
| Zambia | $575 | 44% | $417 | 32% | $483 | 37% | $539 | 41% |
| Zimbabwe | $273 | 30% | $202 | 22% | $239 | 26% | $263 | 28% |

| **Supplementary File 2.**  **Variables used to calculate DALYs averted** | | | |
| --- | --- | --- | --- |
| **Variable** | **Measure used** | **Source** | **Year used** |
| 5-year probability of death for females, males and both for ages in a given age category *a* | where MR is all cause death rate per 100,000,  *a* represents age category and *i* represents country | Global Burden of Disease (downloaded January 6, 2017) | 2015 |
| Absolute number of death for females, males and by age category | Number of all cause deaths |
| YLD | Total for all diseases by country |
| Conditional life expectancy for females, males and both by age category | Conditional life expectancy at <1 year, 1-4, 5-9, … , 75-79, 80+ | Global Burden of Disease (downloaded October 20, 2017) |
| Population by females, males and both by age category | where *a* represents age category and *i* represents country | Calculated from Global Burden of Disease (downloaded January 6, 2017) for internal consistency |
| Per capita GDP (2015 US$) | GDP per capita (current US$) | World Bank (downloaded February 7, 2017) | 2015 or most recent year on file |
| Government health expenditure (2015 US$) | Health expenditure per capita (current US$) | World Bank (downloaded February 6, 2017) | 2014 |
| YLL |  | Calculated from absolute deaths and conditional life expectancy variables | 2015 |
| DALY | where *i* represents country | Calculated from YLL and YLD variables | 2015 |
